# Supplementary material for: Circadian clock mechanism driving mammalian photoperiodism
Source: PubMed Central journal article supplement (PMC7453030; doi:10.1038/s41467-020-18061-z), 2020-08-27
Supplement: 41467_2020_18061_MOESM3_ESM.pdf [file 41467_2020_18061_MOESM3_ESM.pdf]

## **Description of Additional Supplementary Files**

**File Name:** Supplementary Data 1

**Description:** Seasonal epigenetic changes, MACs peak calling CHIP-seq H3k4me3

**File Name:** Supplementary Data 2

**Description:** Seasonal epigenetic changes, SICER differential peak analysis for H3K4me3

**File Name:** Supplementary Data 3.

**Description:** Seasonal gene expression, pairwise contrasts for RNA-seq

**File Name:** Supplementary Data 4

**Description:** CAGE transcription start site clusters and their relative seasonal abundance

**File Name:** Supplementary Data 5

**Description:** RNA-seq expression for known H3K4me3 modulators  
Supplementary Data 6: Diurnal gene expression, statistical analysis of 24 hour profiles from RNA-seq
